# Supplementary material for: Tackling Antibiotic Resistance: Exploring 5-Fluorouracil as a Promising Antimicrobial Strategy for the Treatment of Streptococcus suis Infection
Source: MDPI journal article supplement (doi:10.3390/ani14091286), 2024-04-24
Supplement: s1 [file s1]

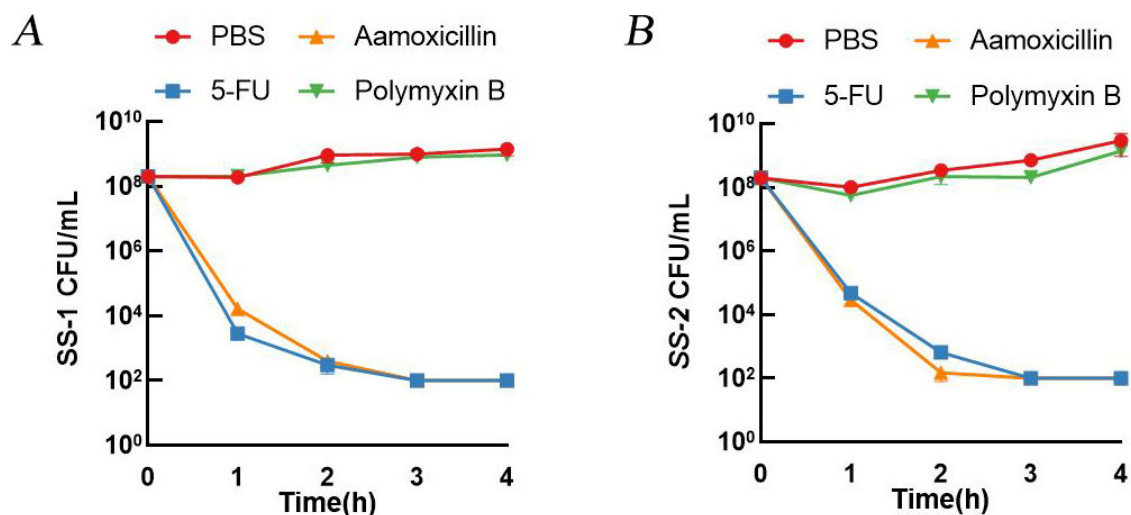

**Figure S1, related to Fig 1D. Colony forming units (CFUs mL<sup>-1</sup>) after 4-h treatment of SS-1 and/or SS-2 with different drugs. (A) Colony forming units (CFUs mL<sup>-1</sup>) after 4-h treatment of SS-1 with PBS (solvent control), 20  $\mu$ g/mL 5-FU (4 $\times$ MIC), 10  $\mu$ g/mL Amoxicillin (4 $\times$ MIC), or 2 mg/mL Polymyxin B (4 $\times$ MIC). (B) Colony forming units (CFUs mL<sup>-1</sup>) after 4-h treatment of SS-2 with PBS (solvent control), 20  $\mu$ g/mL 5-FU (4 $\times$ MIC), 10  $\mu$ g/mL Amoxicillin (4 $\times$ MIC), or 2 mg/mL Polymyxin B (4 $\times$ MIC). Data points at  $1 \times 10^2$  CFU mL<sup>-1</sup> are below the level of detection. Each data point represents 3 biological replicates. Mean  $\pm$  SD are shown.**

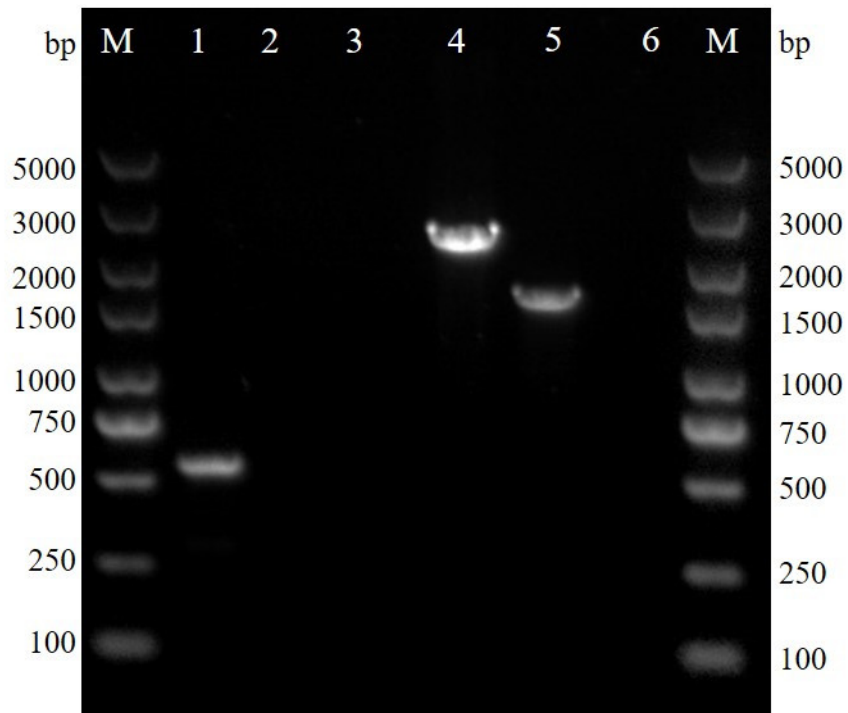

**Figure S2. PCR confirmation of the knockout mutant strain  $\Delta thyA$ .** Lane 1, primers ORF-S/ORF-A, HA9801; lane 2, primers ORF-S/ORF-A,  $\Delta thyA$ ; lane 4, primers XY-S/XY-A, HA9801; lane 5, primers XY-S/XY-A,  $\Delta thyA$ . Lanes 3 and 6 represent the negative control.

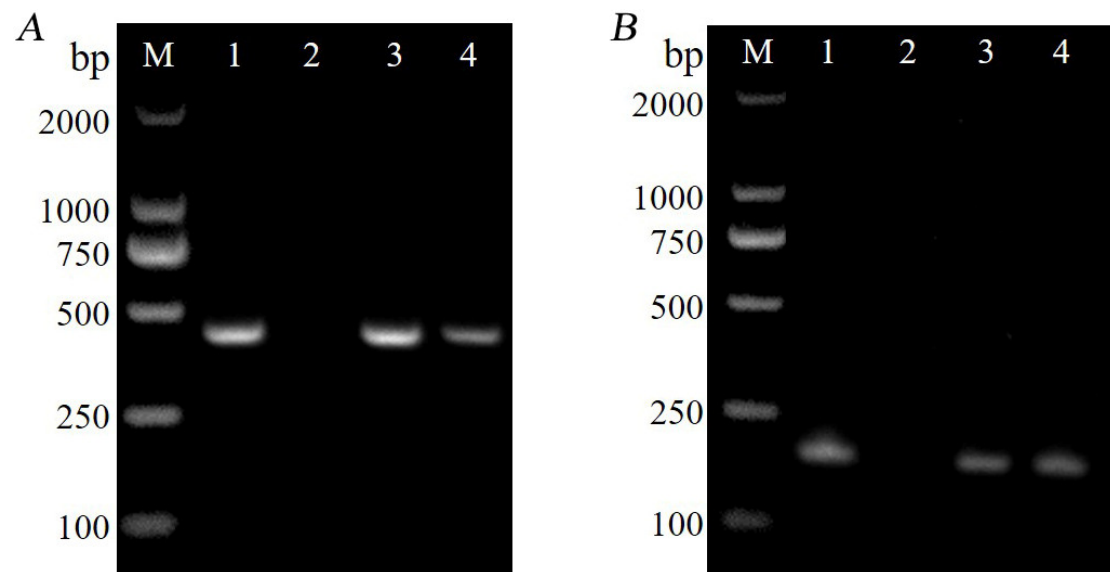

**Figure S3. Identification of strain types and serotypes of SS-1 and SS-2. (A)** PCR confirmation of *gdh* gene. Lane 1, HA9801; lane 2, negative control; lane 3, SS-1; lane 4, SS-2. **(B)** PCR confirmation of *cps2* gene. Lane 1, HA9801; lane 2, negative control; lane 3, SS-1; lane 4, SS-2.
